# Supplementary material
Source: PubMed Central journal article supplement (PMC30192)
Supplement: pnas_041622398_4.pdf [file pnas_041622398_4.pdf]

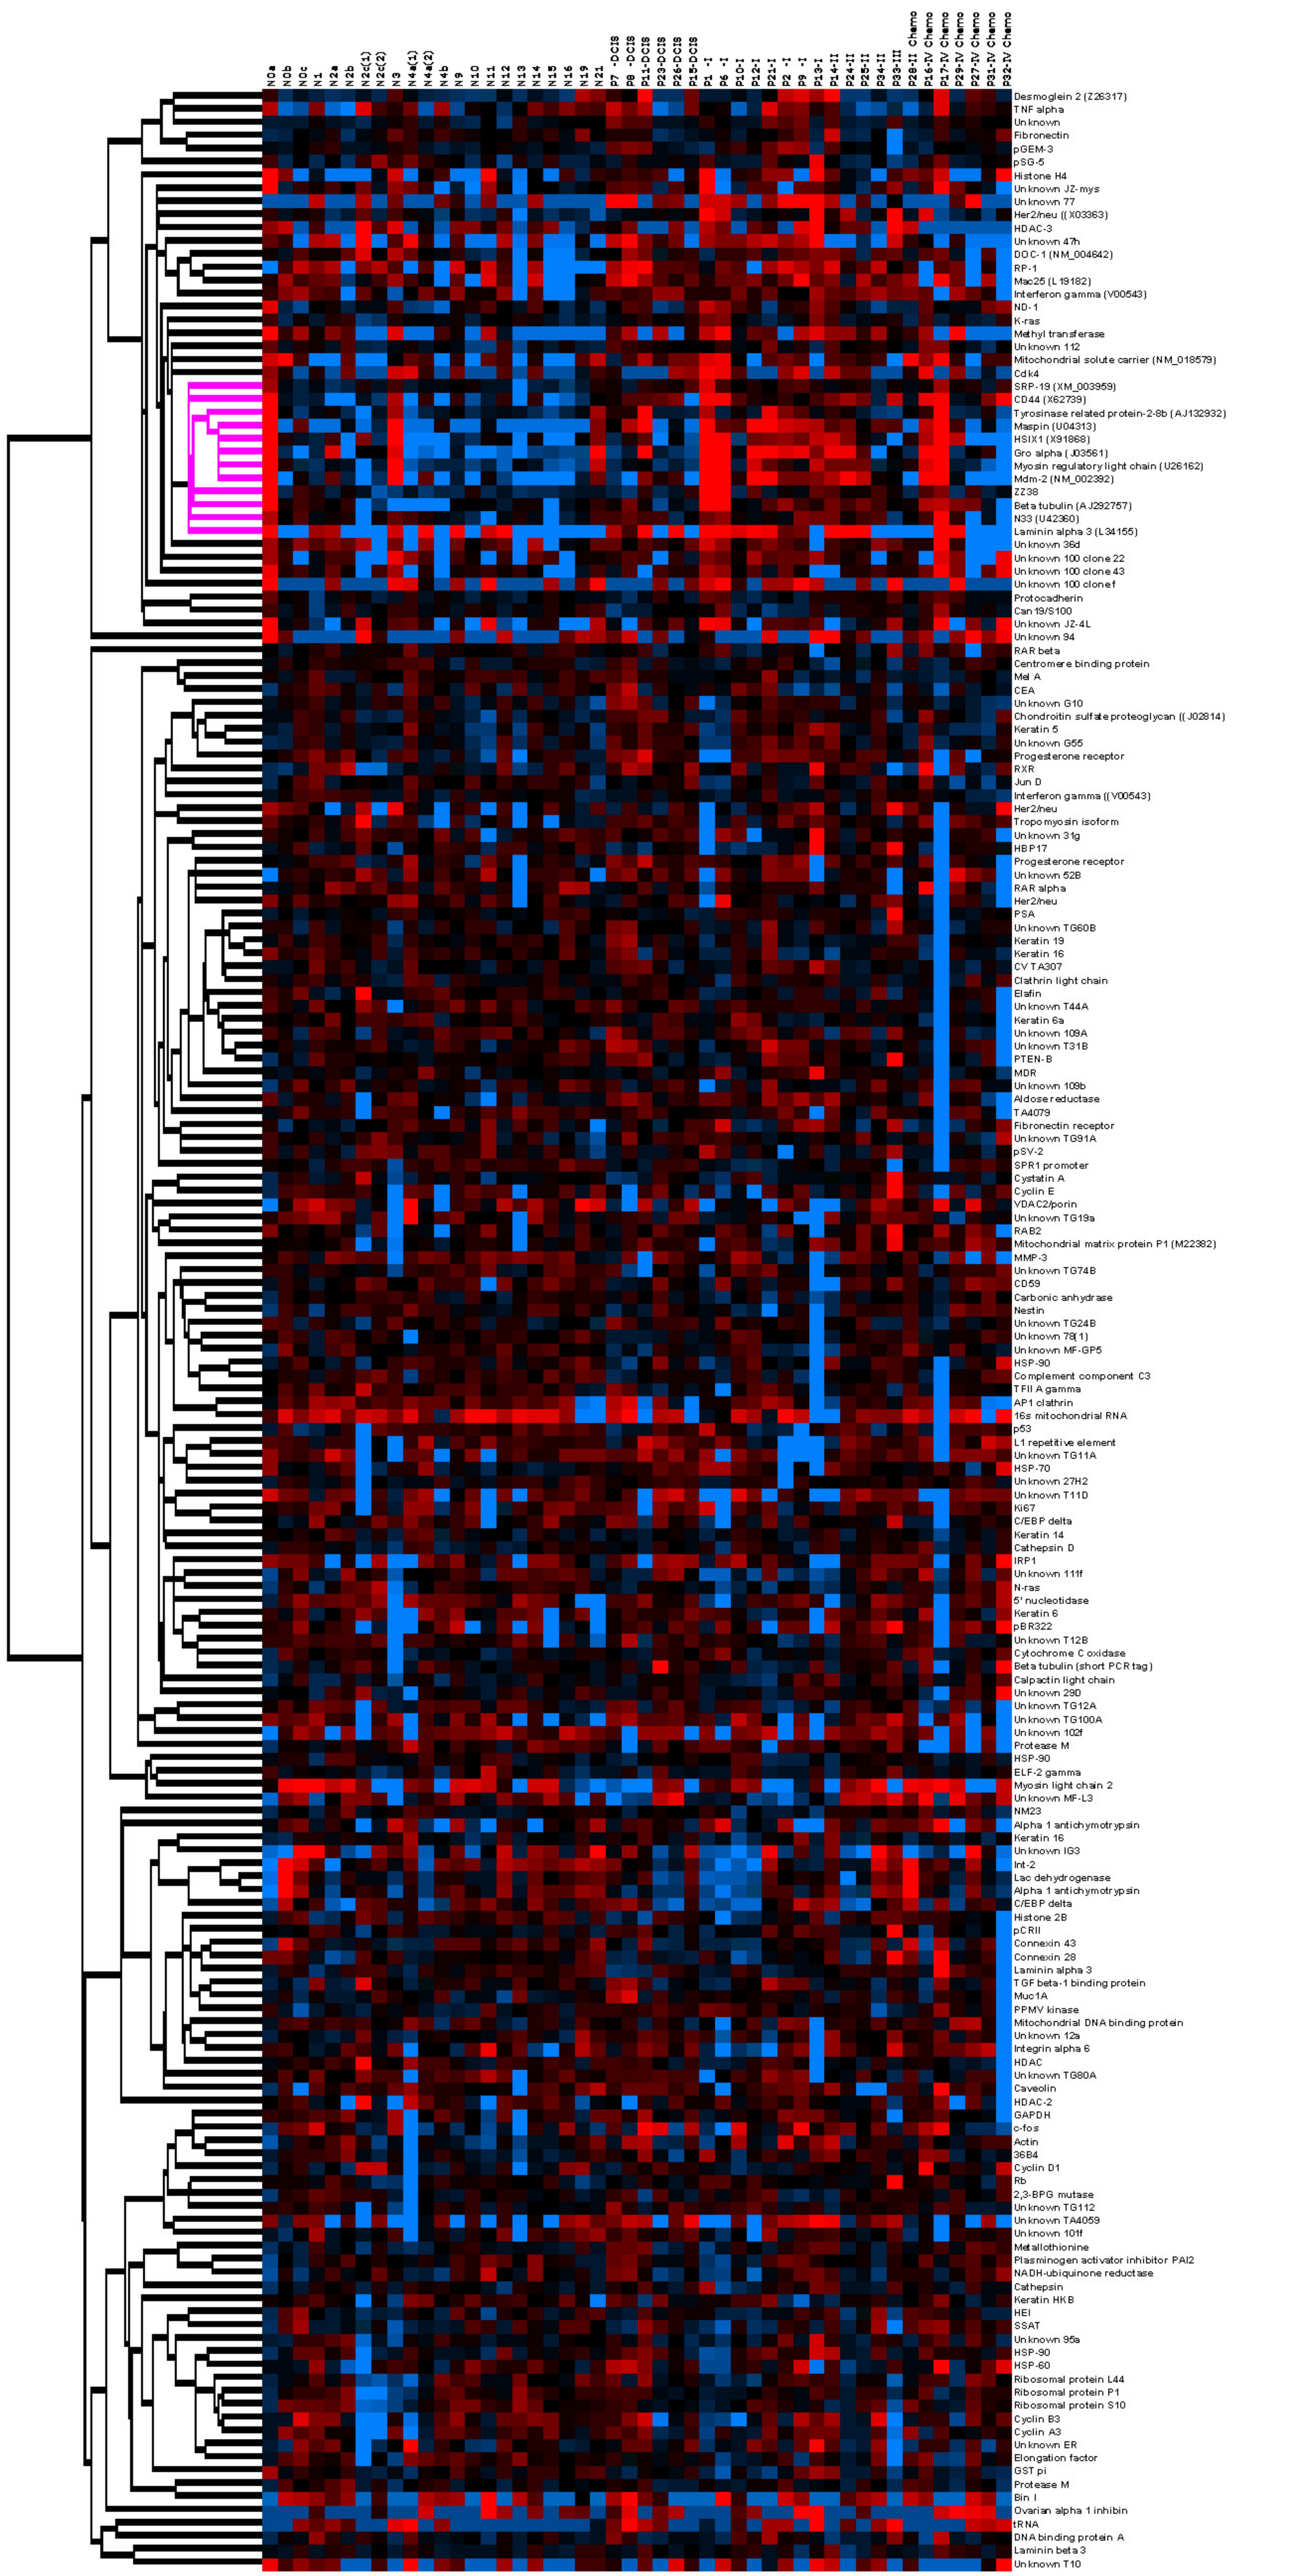

N0a  
N0b  
N0c  
N1  
N2a  
N2b  
N2c(1)  
N2c(2)  
N3  
N4a(1)  
N4a(2)  
N4b  
N9  
N10  
N11  
N12  
N13  
N14  
N15  
N16  
N19  
N21  
P7 -DCIS  
P8 -DCIS  
P11-DCIS  
P23-DCIS  
P26-DCIS  
P15-DCIS  
P1 -I  
P6 -I  
P10-I  
P12-I  
P21-I  
P2 -I  
P9 -I  
P13-I  
P14-I  
P24-II  
P25-II  
P34-II  
P38-III  
P28-II Chemo  
P15-IV Chemo  
P17-IV Chemo  
P23-IV Chemo  
P27-IV Chemo  
P31-IV Chemo  
P32-IV Chemo

Desmoglein 2 (Z26317)  
TNF alpha  
Unknown  
Fibronectin  
pGEM-3  
pSG-5  
Histone H4  
Unknown J2-mys  
Unknown 77  
Her2/neu ((X03363)  
HDAC-3  
Unknown 47h  
DOC-1 (NM\_004642)  
RP-1  
Mac25 (L19182)  
Interferon gamma (V00543)  
ND-1  
K-ras  
Methyl transferase  
Unknown 112  
Mitochondrial solute carrier (NM\_018579)  
Cdk4  
SRP-19 (XM\_003959)  
CD44 (X62739)  
Tyrosinase related protein-2-8b (AJ132932)  
Maspin (U04313)  
HSIX1 (X91868)  
Gro alpha (J03561)  
Myosin regulatory light chain (U26162)  
Mdm-2 (NM\_002392)  
ZZ38  
Beta tubulin (A J292757)  
N33 (U42360)  
Laminin alpha 3 (L34155)  
Unknown 36d  
Unknown 100 clone 22  
Unknown 100 clone 43  
Unknown 100 clone f  
Protocadherin  
Can 19S100  
Unknown J2-4L  
Unknown 94  
RAR beta  
Centromere binding protein  
Maf A  
CEA  
Unknown G10  
Chondroitin sulfate proteoglycan ((J02814)  
Keratin 5  
Unknown G55  
Progesterone receptor  
RXR  
Jun D  
Interferon gamma ((V00543)  
Her2/neu  
Tropo myosin isoform  
Unknown 31g  
HBP17  
Progesterone receptor  
Unknown 52B  
RAR alpha  
Her2/neu  
PSA  
Unknown TG60B  
Keratin 19  
Keratin 16  
CV TA307  
Clathrin light chain  
Elafin  
Unknown T44A  
Keratin 6a  
Unknown 108A  
Unknown T31B  
PTEN-B  
MDR  
Unknown 109b  
Aldose reductase  
TA4079  
Fibronectin receptor  
Unknown TG91A  
pSV-2  
SPR1 promoter  
Cystatin A  
Cyclin E  
VDAC2/porin  
Unknown TG19a  
RAB2  
Mitochondrial matrix protein P1 (M22382)  
MMP-3  
Unknown TG74B  
CD59  
Carbonic anhydrase  
Nestin  
Unknown TG24B  
Unknown 78(1)  
Unknown MF-GP5  
HSP-90  
Complement component C3  
TFII A gamma  
AP1 clathrin  
16S mitochondrial RNA  
p53  
L1 repetitive element  
Unknown TG11A  
HSP-70  
Unknown 27H2  
Unknown T11D  
KIS7  
C/EBP delta  
Keratin 14  
Cathepsin D  
IRP1  
Unknown 111f  
N-ras  
5' nucleotidase  
Keratin 6  
pBR322  
Unknown T12B  
Cytochrome C oxidase  
Beta tubulin (short PCR tag)  
Calpactin light chain  
Unknown 28D  
Unknown TG12A  
Unknown TG100A  
Unknown 102f  
Protease M  
HSP-90  
ELF-2 gamma  
Myosin light chain 2  
Unknown MF-L3  
NM23  
Alpha 1 antichymotrypsin  
Keratin 16  
Unknown IG3  
Int-2  
Lac dehydrogenase  
Alpha 1 antichymotrypsin  
C/EBP delta  
Histone 2B  
pCR11  
Connexin 43  
Connexin 28  
Laminin alpha 3  
TGF beta-1 binding protein  
Muc1A  
PPMY kinase  
Mitochondrial DNA binding protein  
Unknown 12a  
Integrin alpha 6  
HDAC  
Unknown TG80A  
Caveolin  
HDAC-2  
GAPDH  
c-fos  
Actin  
3EB4  
Cyclin D1  
Rb  
2,3-BPG mutase  
Unknown TG112  
Unknown TA4059  
Unknown 101f  
Metallothioneine  
Plasminogen activator inhibitor PAI2  
NADH-ubiquinone reductase  
Cathepsin  
Keratin HK8  
HEI  
SSAT  
Unknown 95a  
HSP-90  
HSP-60  
Ribosomal protein L44  
Ribosomal protein P1  
Ribosomal protein S10  
Cyclin B3  
Cyclin A3  
Unknown ER  
Elongation factor  
GST pi  
Protease M  
Bin 1  
Ovarian alpha 1 inhibin  
tRNA  
DNA binding protein A  
Laminin beta 3  
Unknown T10
