# Supplementary material
Source: PubMed Central journal article supplement (PMC30192)
Supplement: pnas_041622398_6.pdf [file pnas_041622398_6.pdf]

|        | ID No.          | Cancer Type     | Stage | Weeks Post-Op. | Chemotherapy           |  |
|--------|-----------------|-----------------|-------|----------------|------------------------|--|
| A      | P13             | Invasive ductal | I     | none           |                        |  |
|        | P16             | Invasive ductal | IV    | 30             | Not specified          |  |
|        | N21             | -               | -     | -              |                        |  |
|        | N3              | -               | -     | -              |                        |  |
|        | P6              | Invasive ductal | I     | 1              |                        |  |
|        | P14             | Invasive ductal | II    | none           |                        |  |
|        | N0a             | -               | -     | -              |                        |  |
|        | P1              | Invasive ductal | I     | 3              |                        |  |
|        | P17             | Invasive ductal | IV    | >50            | doxil, navelbine       |  |
|        | P12             | Invasive ductal | I     | 4              |                        |  |
|        | P24             | Invasive ductal | II    | 3              |                        |  |
|        | P11             | Local           | DCIS  | 4              |                        |  |
|        | P21             | Invasive ductal | I     | 7              |                        |  |
|        | P2              | Invasive ductal | I     | 3              |                        |  |
|        | P9              | Invasive ductal | I     | ?              |                        |  |
| B      | N11             | -               | -     | -              |                        |  |
|        | P10             | Invasive ductal | I     | ?              |                        |  |
|        | P26             | Local           | DCIS  | 5              |                        |  |
|        | P29             | Invasive ductal | IV    | 5              | doxil, navelbine       |  |
|        | P25             | Invasive ductal | II    | 3              |                        |  |
|        | P7              | Local           | DCIS  | 5              |                        |  |
|        | N9              | -               | -     | -              |                        |  |
|        | N12             | -               | -     | -              |                        |  |
|        | N1              | -               | -     | -              |                        |  |
|        | N4a(2)          | -               | -     | -              |                        |  |
|        | N2a             | -               | -     | -              |                        |  |
|        | C               | P8              | Local | DCIS           | 7                      |  |
| P27    |                 | Invasive ductal | IV    | 50             | tamoxifen, pamidronate |  |
| P31    |                 | Invasive ductal | IV    | >50            | herceptin, navelbine   |  |
| P33    |                 | Invasive ductal | III   | 2              |                        |  |
| P23    |                 | Local           | DCIS  | 2              |                        |  |
| N2c(1) |                 | -               | -     | -              |                        |  |
| P32    |                 | Invasive ductal | IV    | 20             | doxil, navelbine       |  |
| N19    |                 | -               | -     | -              |                        |  |
| N0b    |                 | -               | -     | -              |                        |  |
| P28    |                 | Invasive ductal | II    | 10             | CMF                    |  |
| N14    |                 | -               | -     | -              |                        |  |
| N2c(2) |                 | -               | -     | -              |                        |  |
| N10    |                 | -               | -     | -              |                        |  |
| N4a(1) |                 | -               | -     | -              |                        |  |
| N4b    |                 | -               | -     | -              |                        |  |
| N16    |                 | -               | -     | -              |                        |  |
| P15    |                 | Local           | DCIS  | none           |                        |  |
| N15    |                 | -               | -     | -              |                        |  |
| N2b    | -               | -               | -     |                |                        |  |
| N13    | -               | -               | -     |                |                        |  |
| N0c    | -               | -               | -     |                |                        |  |
| P34    | Invasive ductal | II              | 2     |                |                        |  |
