# Supplementary material
Source: PubMed Central journal article supplement (PMC30192)
Supplement: pnas_041622398_7.pdf [file pnas_041622398_7.pdf]

Table 1. Sequences of primers used for Quantitative Real-Time PCR experiments.

|                              |                       |
|------------------------------|-----------------------|
| Maspin forward               | ATCTCAGAACAAAGAAGAACC |
| Maspin reverse               | CGGTTTCATGGATTACTTCTC |
| Mdm-2 forward                | AGACCGAGTCTTGCTCTGTT  |
| Mdm-2 reverse                | GACTGTAGGCCAAGCTAAT   |
| Gro- $\alpha$ forward        | GTGGTCAACATTTCTCATGT  |
| Gro- $\alpha$ reverse        | CTAAGCCAGAAACACTGTAA  |
| GAPDH forward                | CTCCTCTGACTTCAACA     |
| GAPDH reverse                | GTAGCCAAATTCGTTGTCA   |
| $\beta$ -actin forward       | ACCCAGCACAATGAAGATCA  |
| $\beta$ -actin reverse       | TCGTCATACTCCTGCTTGCT  |
| Ribosomal protein P0 forward | TGCAGATTGGCTACCCAAC   |
| Ribosomal protein P0 reverse | TTCAGCAAGTGGGAAGGT    |
| Cyclophilin forward          | GCTGCCTGTGCACTCATGAA  |
| Cyclophilin reverse          | CAGTGCCATTGTGGTTTGTGA |
