# Supplementary material
Source: PubMed Central journal article supplement (PMC30192)

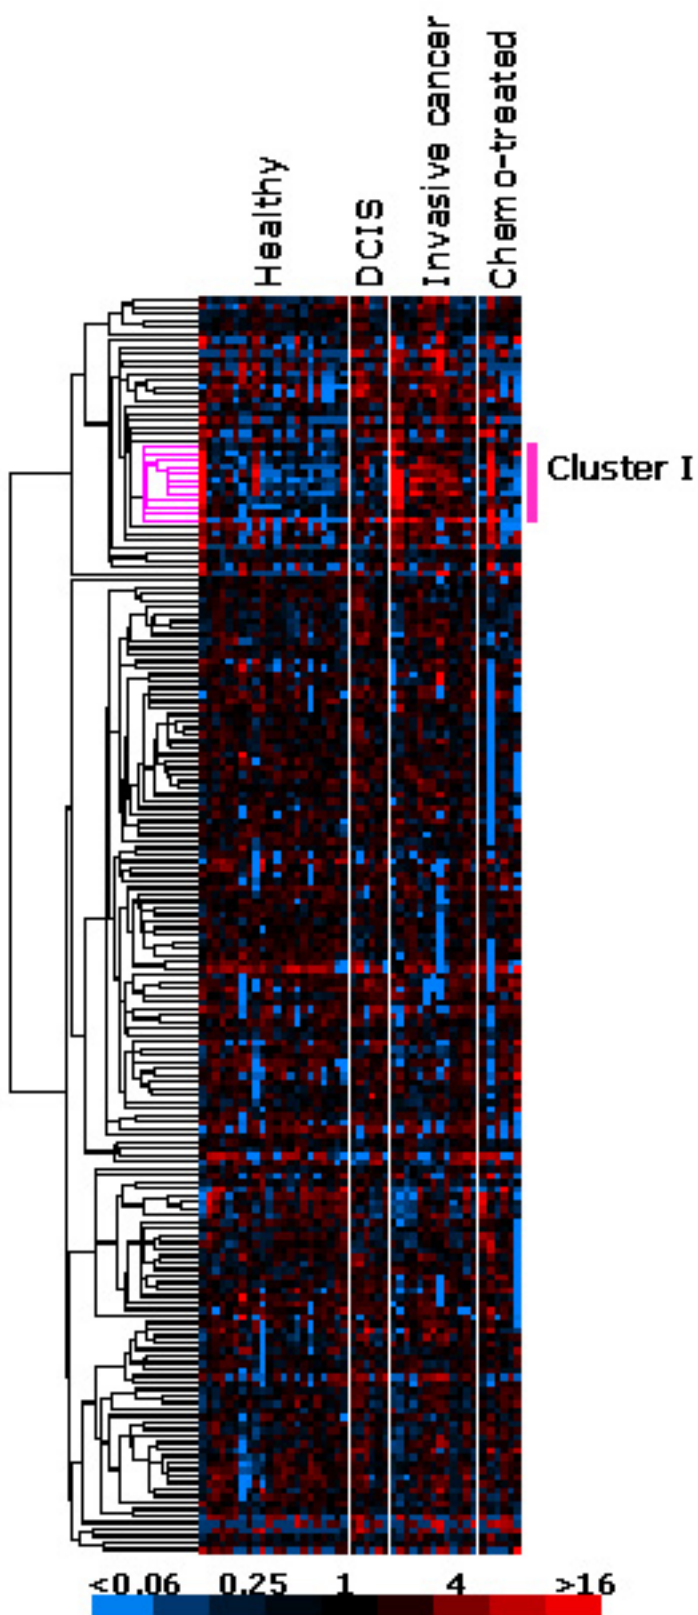

Supplement: pnas_041622398_2.pdf [file pnas_041622398_2.pdf]
